# Supplementary material
Source: PubMed Central journal article supplement (PMC6172953)

## Supplementary Material

### Chromatin-bound oxidized $\alpha$ -Synuclein causes strand breaks in neuronal genomes in *in vitro* models of Parkinson's disease

Velmarini Vasquez<sup>1,2,3</sup>, Joy Mitra<sup>1</sup>, Pavana M. Hegde<sup>1</sup>, Arvind Pandey<sup>1</sup>, Shiladitya Sengupta<sup>1,5</sup>, Sankar Mitra<sup>1,5</sup>, K. S. Rao<sup>3\*</sup>, and Muralidhar L. Hegde<sup>1,4,5\*</sup>

<sup>1</sup>Department of Radiation Oncology, Houston Methodist Research Institute, Houston, Texas 77030, USA. <sup>2</sup>Centre for Neuroscience, Instituto de Investigaciones Científicas y Servicios de Alta Tecnología, City of Knowledge, Republic of Panama. <sup>3</sup>Department of Biotechnology, Acharya Nagarjuna University, Guntur, India. <sup>4</sup>Houston Methodist Neurological Institute, Institute of Academic Medicine, Houston Methodist Hospital, <sup>5</sup>Weill Cornell Medical College of Cornell University, New York 10065, USA.

*\*Corresponding authors:* Muralidhar L. Hegde, PhD, Department of Radiation Oncology, Houston Methodist Research Institute, Fannin St., Smith 8-05, Houston, Texas 77030, USA; Tel: +1-713-441-7456; Fax: +1-713-790-3755; Email: [mlhegde@houstonmethodist.org](mailto:mlhegde@houstonmethodist.org) and K.S. Rao, Centre for Neuroscience, Instituto de Investigaciones Científicas y Servicios de Alta Tecnología (INDICASAT AIP), City of Knowledge, Republic of Panama; Email: [kjr5n2009@gmail.com](mailto:kjr5n2009@gmail.com)

**Supplementary Material includes one table and three figures.**

**Supplementary Table 1.** Primer oligonucleotide sequences used for quantitative real time PCR amplification of ChIP products in Fig. 1D and Fig. S1.

| Primer sequences used in ChIP analysis |                                |
|----------------------------------------|--------------------------------|
| RAR $\beta$ 2 promoter (-165/+82) F    | 5'- CTCTGGCTGTCTGCTTTTGC-3'    |
| RAR $\beta$ 2 promoter (-165/+82) R    | 5'-CATGGGGGAATTCTGGTCCC-3'     |
| RAR $\beta$ 2 distal (-72987/-72800) F | 5'-TGGTTAGGTTTGGGCGTGTT -3'    |
| RAR $\beta$ 2 distal (-72987/-72800) R | 5'-GGGGCTATGACTGAAGTGCT-3'     |
| Chromosome 17 F                        | 5'-TACTATCCCCGTGCTTCCCA-3'     |
| Chromosome 17 R                        | 5'-CATTGAGGAGGGGGCAACAT-3'     |
| HPRT F                                 | 5'-TGACCTTGATTTATTTTGCATACC-3' |
| HPRT R                                 | 5'-CGAGCAAGACGTTTCAGTCCT-3'    |

**Supplementary Fig. S1.** (Linked to Fig. 1D). Chromatin Immunoprecipitation (ChIP) using FLAG antibody from pCW-iFLAG- $\alpha$ -Syn SHSY-5Y cells after Dox induction (72 h) and PCR amplification of indicated genomic segments using three randomly selected primer pairs. The PCR products were separated in 1% agarose gel electrophoresis. (A) Representative agarose gel separation of ChIP-PCR products for proximal and distal regions of RARB2 and a randomly selected region in chromosome (CHR) 17 and HPRT (B). Representative agarose gel image (left) and histogram of RT-PCR analysis for HPRT gene (right) are shown. Other details are in Material and Methods.

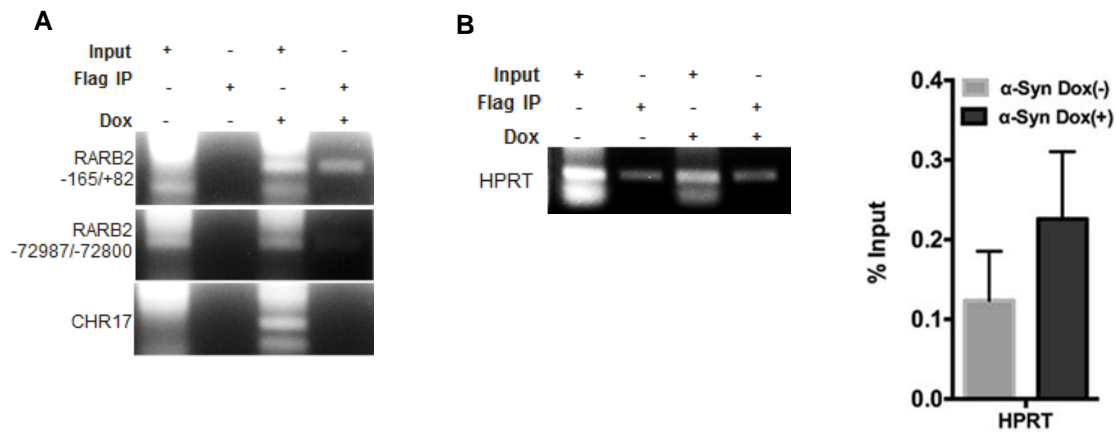

**Supplementary Fig. S2.** (Linked to Fig. 2). (A) Alkaline Comet assay from SHSY-5Y cells treated with 300 nM recombinant  $\alpha$ -Syn with or without 200 $\mu$ M FeSO<sub>4</sub>. A synergistic increase in mean comet tail moment was observed by  $\alpha$ -Syn + Fe. FeSO<sub>4</sub> alone at the same concentration causes negligible genome damage. (B) Amplification of *HPRT* gene by LA-PCR assay from neural progenitor cells treated with 300 nM recombinant  $\alpha$ -Syn with or without 200 $\mu$ M FeSO<sub>4</sub>. Cells treated with both  $\alpha$ -Syn and Fe showed ~22% decrease in amplified product, indicating increased DNA strand breaks. Whereas,  $\alpha$ -Syn or Fe alone caused negligible DNA damage.

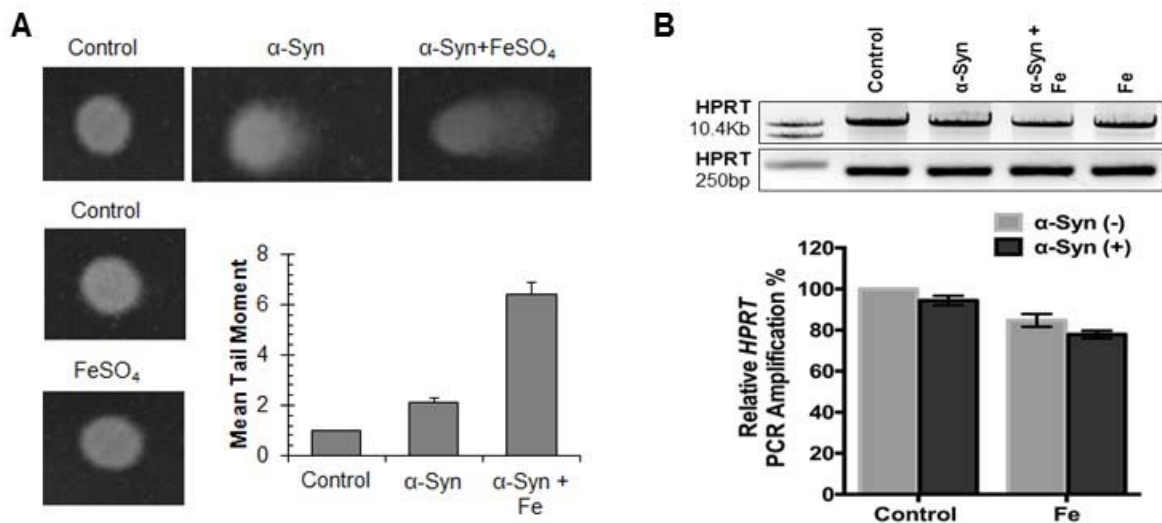

**Supplementary Fig. S3.** (Linked to Fig. 10). Protein DNA docking models demonstrating binding of  $\alpha$ -Syn (PDB: 1XQ8) N-terminal amino acid residues to the crystal structure of B-DNA duplex (PDB:3IXN). **(A)** Model 2 shows  $\alpha$ -Syn amino acid residues Lys-45, Val-55, Lys-32, Glu-28 interaction with BDNA. **(B)** Model 3 shows  $\alpha$ -Syn amino acid residues Lys-43, Thr-54, Val-55, Lys-58. Model 2 and Model 3 represents the second and third best structures from the bigger cluster after refinement.

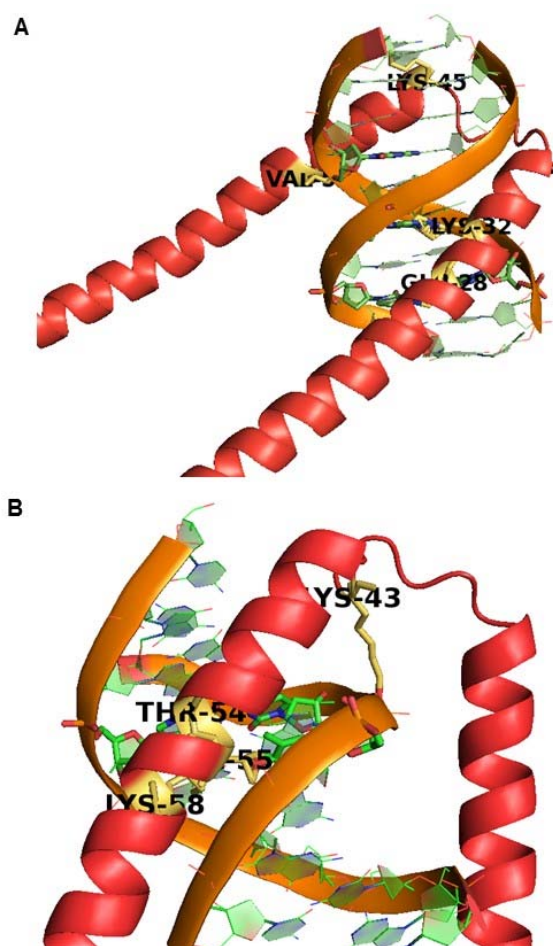

Supplement: NIHMS988709-supplement-Supplementary_Material.pdf [file NIHMS988709-supplement-Supplementary_Material.pdf]
